# Supplementary material for: Modifying the Expression of Cysteine Protease Gene PCP Affects Pollen Development, Germination and Plant Drought Tolerance in Maize
Source: MDPI journal article supplement (doi:10.3390/ijms24087406), 2023-04-17
Supplement: s1 [file s1]

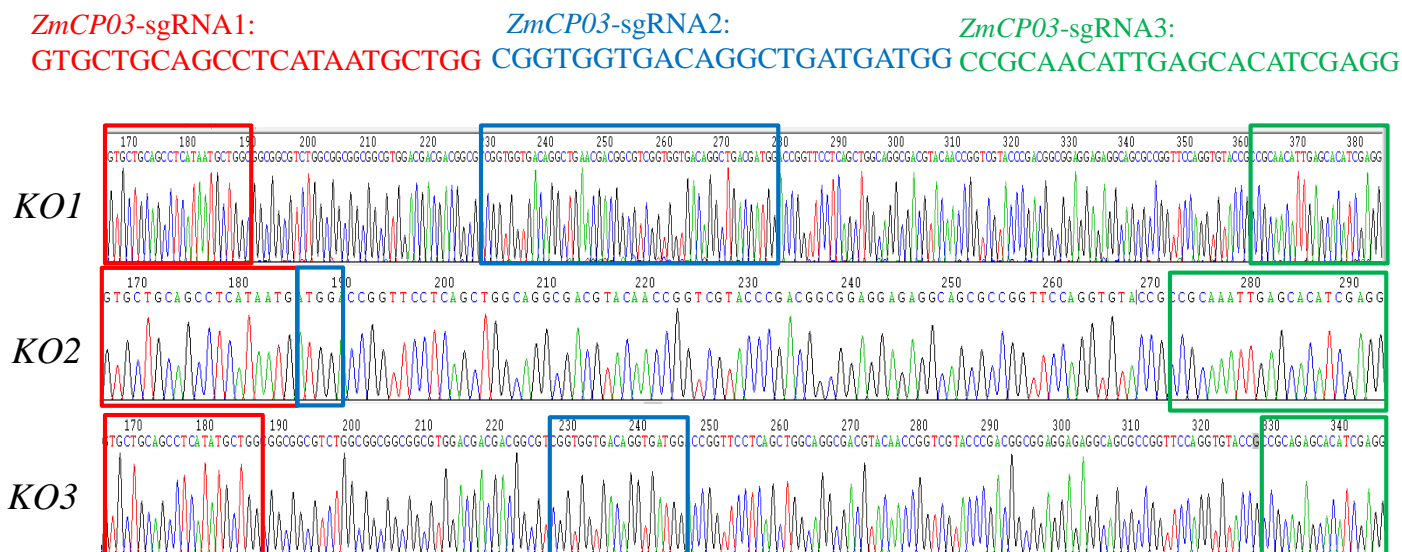

**Figure S1.** The sequencing results of pollen grains of T2 mutants.

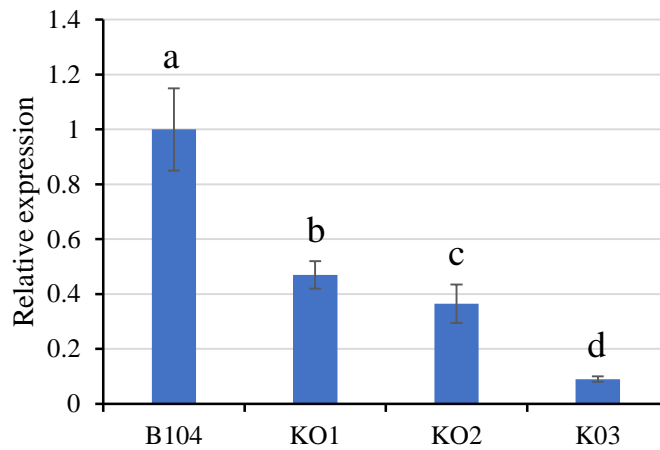

**Figure S2.** The relative expression levels of *PCP* were analyzed via RT-qPCR in *pcp* mutant lines. Data represent means  $\pm$  SD of three replicates. Significant differences were indicated with different letters ( $P < 0.05$ , one-way ANOVA).

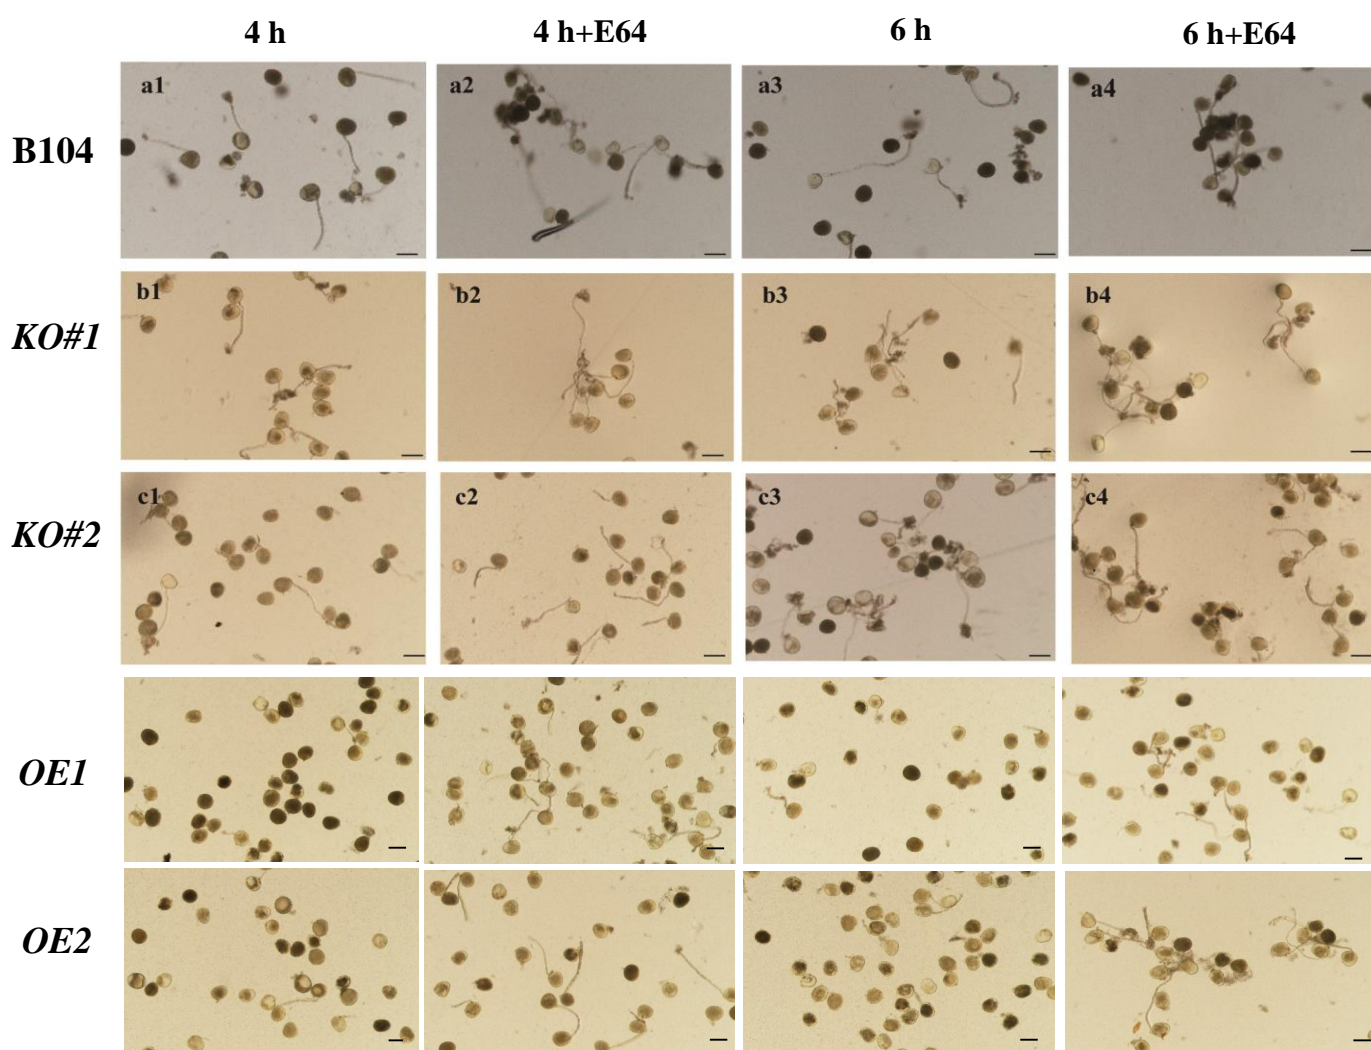

**Figure S3.** Pictures of pollen germination and growth *in vitro* between wild type and transgenic lines after 4 h and 6 h incubation. Scale bar: 100  $\mu$ m.

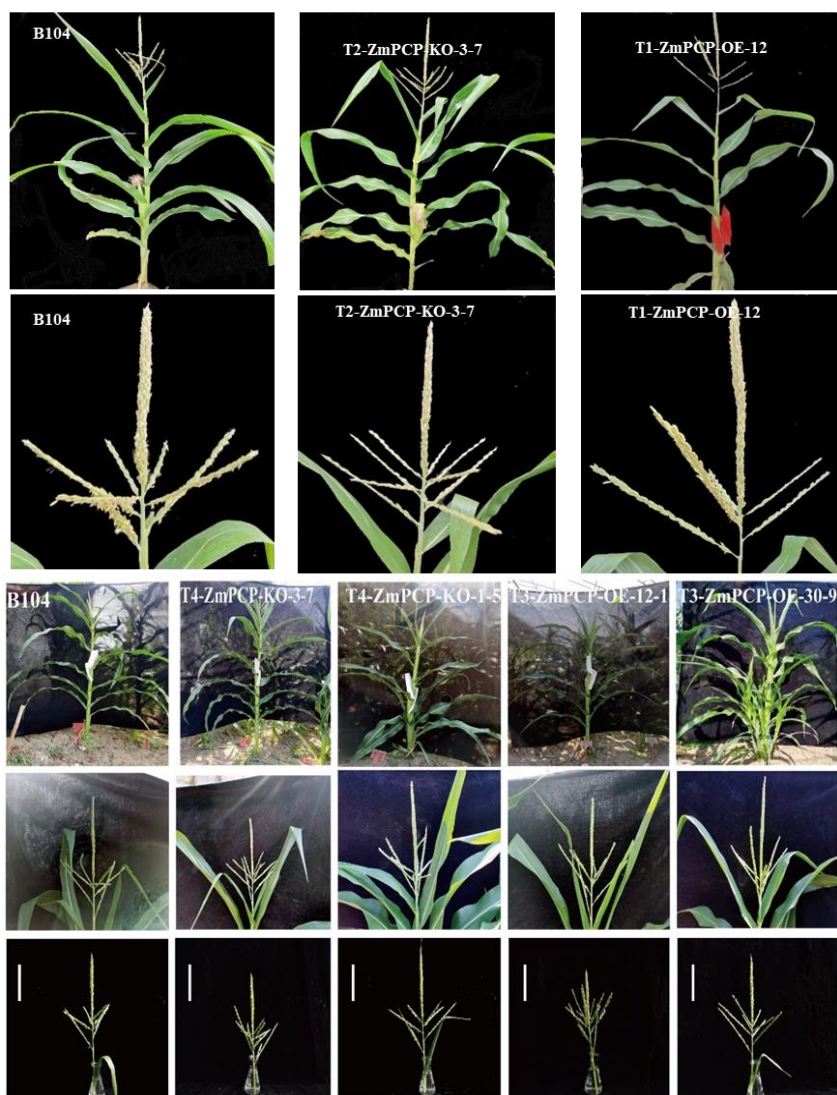

**Figure S4.** Phenotypic observation of WT and transgenic maize at flowering stage. Scale bar: 10 cm.

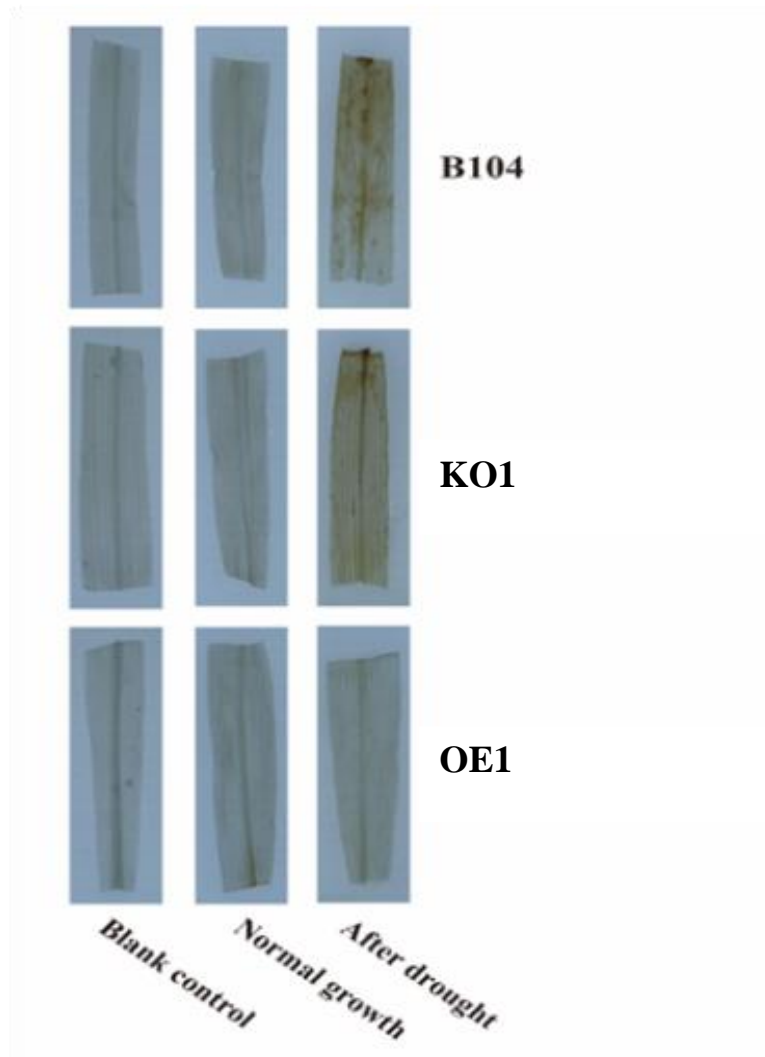

**Figure S5.** Measurement of  $H_2O_2$  content in WT and transgenic maize in response to drought stress by DAB staining.

**Table S1.** PCR primers used in this study.

| Primer name      | Primer sequence (5'-3')                | Usage                                   |
|------------------|----------------------------------------|-----------------------------------------|
| sgRNA-T1-F       | cagt ggtctca GGCA CCTCGATGTGCTCAATGTTG | Synthesis of<br>sgRNA                   |
| sgRNA-T1-R       | cagt ggtctca AAACCAACATTGAGCACATCGAGG  |                                         |
| sgRNA-T2-F       | cagt ggtctca GCCG TGCTGCAGCCTCATAATGC  |                                         |
| sgRNA-T2-R       | cagt ggtctca AAAC GCATTATGAGGCTGCAGCA  |                                         |
| sgRNA-T3-F       | cagtgggtctcaTGTGCGGTGGTGACAGGCTGATGA   |                                         |
| sgRNA-T3-R       | cagt ggtctca AAACTCATCAGCCTGTCACCACCG  |                                         |
| psgA-T1          | GACCATAGCACAAGACAGGCGT                 | Detection of<br>intermediate<br>vectors |
| psgB-T2          | CGAATGAGCCCTGAAGTCTGAAC                |                                         |
| psgC-T3          | CATTTTCATTACCTCTTTCTCC                 |                                         |
| pOSCas9-ZmCP03-F | GATGGGTTTTTTATGATTAGAGTCC              | Detection of<br>expression<br>vectors   |
| pOSCas9-ZmCP03-R | GGCTCGTATGTTGTGTGG                     |                                         |
